# Supplementary material for: 1D and 2D-HSQC NMR: Two Methods to Distinguish and Characterize Heparin From Different Animal and Tissue Sources
Source: PubMed Central journal article supplement (PMC6610300; doi:10.3389/fmed.2019.00142), 2019-06-27
Supplement: Presentation_1.pdf [file Presentation_1.pdf]

## *Supplementary material*

### **1D and 2D-HSQC NMR: two methods to distinguish and characterize heparin from different animal and tissue sources.**

Lucio Mauri<sup>1</sup>, Maria Marinozzi<sup>1</sup>, Nisarga Phatak<sup>2</sup>, Michael Karfunkle<sup>2</sup>, Kalib StAnge<sup>3</sup>, Marco Guerrini<sup>1\*</sup>, David A. Keire<sup>2\*</sup>, Robert J. Linhardt<sup>3\*</sup>

<sup>1</sup> Istituto di Ricerche Chimiche e Biochimiche "G. Ronzoni", Milan, Italy.

<sup>2</sup> Division of Pharmaceutical Analysis, Office of Testing and Research, Center for Drug Evaluation and Research, U.S. Food and Drug Administration, St. Louis, MO, USA

<sup>3</sup> Department of Chemistry and Chemical Biology, Center for Biotechnology and Interdisciplinary Studies, Rensselaer Polytechnic Institute, Troy, New York.

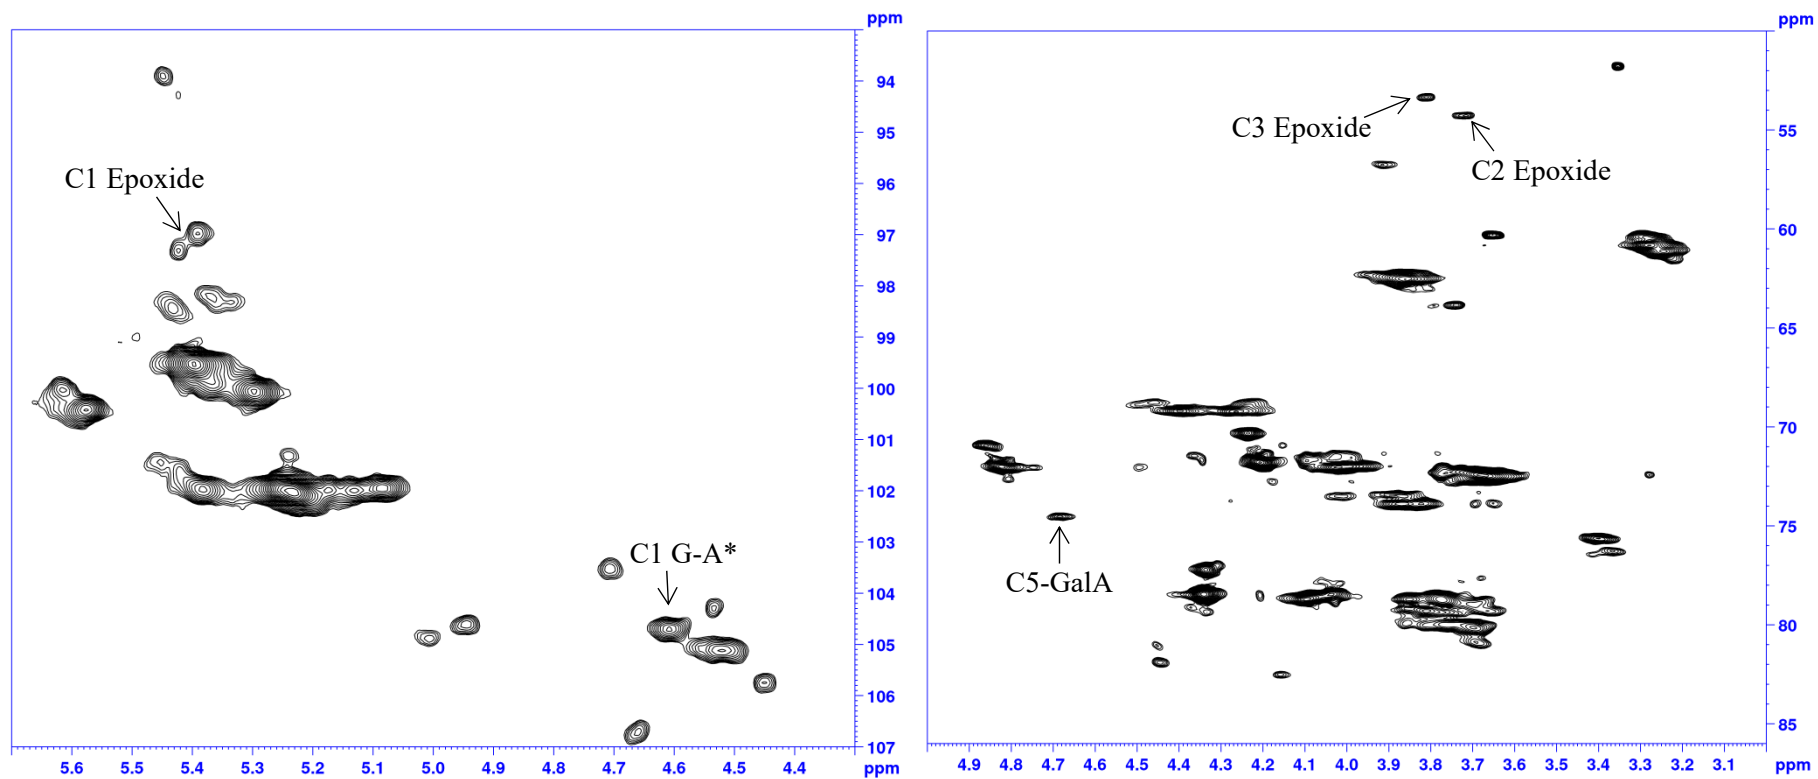

**Figure S1** – HSQC spectrum of beef mucosa heparin containing epoxide and galacturonic acid residues. Expansions of the anomeric signals region (left) and of the ring signals (right).

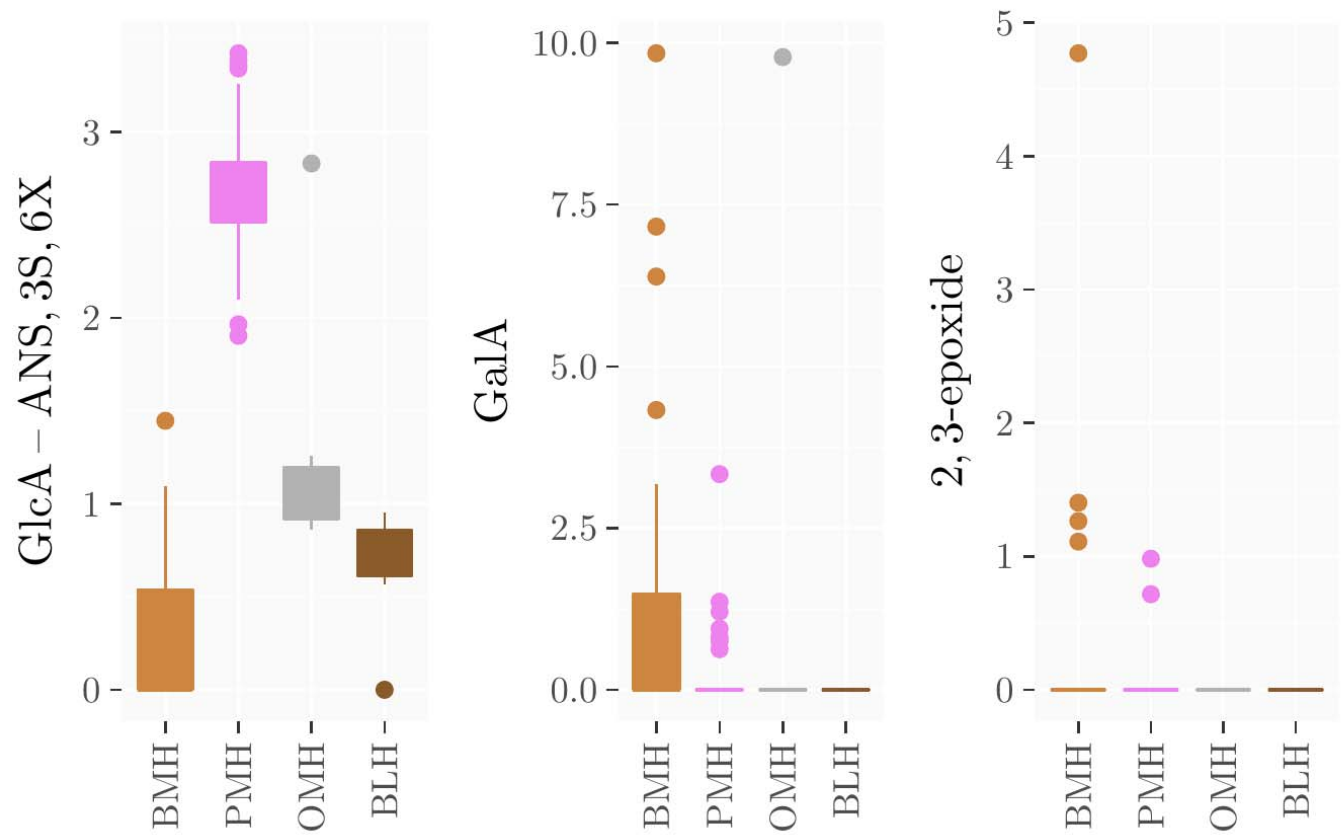

**Figure S2-** Boxplot of the HSQC content of G-(A<sub>NS,3S,6X</sub>), galacturonic acid and epoxide residues.

**Table S1-** Signal intensity ratio calculated on BMH spectra recorded at 500MHz

| Sample | r (1:2) | r (3:2) |
|--------|---------|---------|
| BMH-1  | 1.64    | 1.79    |
| BMH-2  | 1.53    | 1.49    |
| BMH-3  | 1.55    | 1.44    |
| BMH-4  | 1.55    | 1.47    |
| BMH-5  | 1.53    | 1.45    |
| E1     | 1.53    | 1.98    |
| F1     | 1.51    | 1.79    |
| G1     | 1.48    | 1.86    |
| H1     | 1.4     | 1.74    |
| E2     | 1.73    | 2.56    |
| F2     | 1.78    | 2.83    |
| G2     | 1.86    | 2.73    |
| K1     | 1.6     | 1.59    |
| L1     | 1.48    | 1.44    |
| M1     | 1.43    | 1.26    |
| N1     | 1.38    | 1.29    |
| O1     | 1.41    | 1.36    |
| P1     | 1.48    | 1.33    |
| Q1     | 1.52    | 1.55    |
| R1     | 1.53    | 1.54    |
| S1     | 1.6     | 1.48    |
| O2     | 1.65    | 1.48    |
| P2     | 1.64    | 1.49    |
| Q2     | 1.62    | 1.44    |
| R2     | 1.62    | 1.44    |
| BMH-6  | 1.42    | 1.7     |
| BMH-7  | 1.53    | 1.97    |
| BMH-8  | 1.49    | 1.8     |
| BMH-9  | 1.6     | 1.9     |
| BMH-10 | 1.64    | 2.06    |
| BMH-11 | 1.69    | 2.01    |
| BMH-12 | 1.43    | 1.56    |
| BMH-13 | 1.47    | 1.71    |
| BMH-14 | 1.42    | 1.67    |
| BMH-15 | 1.39    | 1.71    |
| BMH-16 | 1.35    | 1.7     |
| BMH-17 | 1.44    | 1.76    |
| BMH-18 | 1.35    | 1.66    |
| BMH-19 | 1.41    | 1.63    |
| MIN    | 1.4     | 1.3     |
| MAX    | 1.8     | 2.9     |

**Table S2-** Signal intensity ratio calculated on BMH spectra recorded at 600MHz

| Sample | r (1:2) | r (3:2) |
|--------|---------|---------|
| E1     | 1.54    | 2.06    |
| F1     | 1.51    | 1.81    |
| G1     | 1.48    | 1.85    |
| H1     | 1.4     | 1.76    |
| E2     | 1.73    | 2.92    |
| F2     | 1.77    | 2.9     |
| G2     | 1.84    | 2.81    |
| K1     | 1.59    | 1.65    |
| L1     | 1.48    | 1.37    |
| M1     | 1.41    | 1.3     |
| N1     | 1.37    | 1.28    |
| O1     | 1.39    | 1.37    |
| P1     | 1.47    | 1.38    |
| Q1     | 1.51    | 1.52    |
| R1     | 1.52    | 1.58    |
| S1     | 1.59    | 1.5     |
| O2     | 1.68    | 1.6     |
| P2     | 1.68    | 1.6     |
| Q2     | 1.66    | 1.59    |
| E1     | 1.68    | 1.55    |
| MIN    | 1.37    | 1.28    |
| MAX    | 1.84    | 2.92    |

**Table S3-** Signal intensity ratio calculated on PMH spectra recorded at 500MHz

| Sample | r (1:2) | r (3:2) |
|--------|---------|---------|
| PMH-1  | 0.66    | 2       |
| PMH-2  | 0.71    | 2.23    |
| PMH-3  | 0.7     | 2.26    |
| PMH-4  | 0.7     | 2.15    |
| PMH-5  | 0.77    | 2.26    |
| PMH-6  | 0.89    | 2.69    |
| PMH-7  | 0.77    | 2.43    |
| PMH-8  | 0.71    | 2.14    |
| PMH-9  | 0.8     | 2.57    |
| PMH-10 | 0.81    | 2.6     |
| PMH-11 | 0.89    | 2.36    |
| PMH-12 | 0.72    | 2       |
| PMH-13 | 0.85    | 2.7     |
| PMH-14 | 0.82    | 2.63    |
| PMH-15 | 0.86    | 2.69    |
| PMH-16 | 0.81    | 2.6     |
| PMH-17 | 0.86    | 2.7     |
| PMH-18 | 0.92    | 2.83    |
| PMH-19 | 0.68    | 1.97    |
| PMH-20 | 0.74    | 2.4     |
| PMH-21 | 0.71    | 1.81    |
| PMH-22 | 0.67    | 1.66    |
| PMH-23 | 0.83    | 2.54    |
| PMH-24 | 0.75    | 2.27    |
| PMH-25 | 0.74    | 2.3     |
| PMH-26 | 0.7     | 1.98    |
| PMH-27 | 0.71    | 2.02    |
| PMH-28 | 0.71    | 1.79    |
| PMH-29 | 0.79    | 2.55    |
| PMH-30 | 0.66    | 1.75    |
| PMH-31 | 0.68    | 1.84    |
| PMH-32 | 0.87    | 2.79    |
| PMH-33 | 0.82    | 2.5     |
| PMH-34 | 0.68    | 2       |
| PMH-35 | 0.68    | 1.73    |
| PMH-36 | 0.72    | 1.85    |
| PMH-37 | 0.72    | 1.86    |
| PMH-38 | 0.71    | 1.95    |
| PMH-39 | 0.75    | 2.23    |
| MIN    | 0.66    | 1.66    |
| MAX    | 0.92    | 2.83    |

**Table S4-** Signal intensity ratio calculated on PMH spectra recorded at 600MHz

| Sample | r (1:2) | r (3:2) |
|--------|---------|---------|
| PMH-1  | 0.65    | 1.97    |
| PMH-2  | 0.67    | 2.12    |
| PMH-3  | 0.65    | 2.13    |
| PMH-4  | 0.65    | 2.08    |
| PMH-5  | 0.73    | 2.18    |
| PMH-6  | 0.83    | 2.57    |
| PMH-7  | 0.76    | 2.12    |
| PMH-8  | 0.66    | 1.94    |
| PMH-9  | 0.74    | 2.34    |
| PMH-10 | 0.76    | 2.37    |
| PMH-11 | 0.85    | 2.31    |
| PMH-12 | 0.67    | 1.86    |
| PMH-13 | 0.78    | 2.44    |
| PMH-14 | 0.77    | 2.41    |
| PMH-15 | 0.81    | 2.45    |
| PMH-16 | 0.76    | 2.37    |
| PMH-20 | 0.67    | 2.22    |
| PMH-25 | 0.67    | 2.12    |
| PMH-39 | 0.7     | 2.09    |
| MIN    | 0.65    | 1.86    |
| MAX    | 0.85    | 2.57    |

**Table S5-** Signal intensity ratio calculated on OMH spectra recorded at 500MHz (a) and 600MHz (b)

a)

| Sample | r (1:2) | r (3:2) |
|--------|---------|---------|
| OMH-1  | 0.54    | 0.96    |
| OMH-2  | 0.48    | 1.01    |
| OMH-3  | 0.52    | 1.02    |
| OMH-4  | 0.48    | 0.98    |
| OMH-5  | 0.54    | 1.23    |
| OMH-6  | 0.52    | 1.21    |
| MIN    | 0.48    | 0.96    |
| MAX    | 0.54    | 1.23    |

b)

| Sample | r (1:2) | r (3:2) |
|--------|---------|---------|
| OMH-1  | 0.54    | 0.93    |
| OMH-2  | 0.45    | 0.92    |
| OMH-3  | 0.47    | 0.95    |
| OMH-4  | 0.44    | 0.9     |
| OMH-5  | 0.50    | 1.12    |
| OMH-6  | 0.48    | 1.1     |
| MIN    | 0.44    | 0.90    |
| MAX    | 0.54    | 1.12    |



**Table S6-** Signal intensity ratio calculated on BLH spectra recorded at 500MHz (a) and 600MHz (b)

a)

| Sample | r (1:2) | r (3:2) |
|--------|---------|---------|
| BLH-1  | 0.29    | 0.18    |
| BLH-2  | 0.34    | 0.31    |
| BLH-3  | 0.34    | 0.32    |
| BLH-4  | 0.38    | 0.4     |
| BLH-5  | 0.36    | 0.36    |
| BLH-6  | 0.38    | 0.38    |
| BLH-7  | 0.37    | 0.4     |
| MIN    | 0.29    | 0.18    |
| MAX    | 0.38    | 0.40    |

b)

| Sample | r (1:2) | r (3:2) |
|--------|---------|---------|
| BLH-1  | 0.27    | 0.16    |
| BLH-2  | 0.31    | 0.29    |
| BLH-3  | 0.32    | 0.28    |
| BLH-4  | 0.35    | 0.37    |
| BLH-5  | 0.33    | 0.33    |
| BLH-6  | 0.35    | 0.35    |
| BLH-7  | 0.33    | 0.38    |
| MIN    | 0.27    | 0.16    |
| MAX    | 0.35    | 0.38    |

**Table S7** - Signal ratios measured on spectra recorded with 16 or 8 scans. Six samples of the same PMH batch were prepared. S/N was calculated for the most intense peak of the 3.75-4.55 ppm region.

| <b>NS 16</b> | <b>r(1:2)</b> | <b>r(3:2)</b> | <b>S/N</b> |
|--------------|---------------|---------------|------------|
| PMH A        | 0.74          | 2.22          | 3458       |
| PMH B        | 0.74          | 2.23          | 3447       |
| PMH C        | 0.81          | 2.01          | 3369       |
| PMH D        | 0.74          | 2.22          | 3392       |
| PMH E        | 0.74          | 2.21          | 3321       |
| PMH F        | 0.74          | 2.22          | 3328       |
| mean         | 0.754         | 2.187         | 3385.8     |
| Std          | 0.030         | 0.087         | 58.02      |
| CV%          | 3.9           | 4.0           | 1.7        |
|              |               |               |            |
| <b>NS 8</b>  | <b>r(1:2)</b> | <b>r(3:2)</b> |            |
| PMH A        | 0.75          | 2.23          | 2451       |
| PMH B        | 0.75          | 2.22          | 2478       |
| PMH C        | 0.82          | 2.01          | 2424       |
| PMH D        | 0.75          | 2.16          | 2387       |
| PMH E        | 0.75          | 2.21          | 2333       |
| PMH F        | 0.74          | 2.23          | 2376       |
| mean         | 0.758         | 2.177         | 2408.2     |
| Std          | 0.029         | 0.085         | 53.1       |
| CV%          | 3.8           | 3.9           | 2.2        |

**Table S8** - Signal intensity ratio  $r$  (1:2) calculated on BMH spectra recorded in two different laboratories

| Sample     | r(1:2) | r(1:2) |
|------------|--------|--------|
|            | Lab 1  | Lab 2  |
| E1         | 1.53   | 1.56   |
| F1         | 1.51   | 1.55   |
| G1         | 1.48   | 1.43   |
| H1         | 1.40   | 1.43   |
| E2         | 1.73   | 1.78   |
| F2         | 1.78   | 1.75   |
| G2         | 1.86   | 1.85   |
| K1         | 1.60   | 1.59   |
| L1         | 1.48   | 1.41   |
| M1         | 1.43   | 1.42   |
| N1         | 1.38   | 1.20   |
| O1         | 1.41   | 1.40   |
| P1         | 1.48   | 1.50   |
| Q1         | 1.52   | 1.47   |
| R1         | 1.53   | 1.53   |
| S1         | 1.60   | 1.78   |
| O2         | 1.65   | 1.65   |
| P2         | 1.64   | 1.68   |
| Q2         | 1.62   | 1.58   |
| R2         | 1.62   | 1.41   |
| <b>min</b> | 1.38   | 1.20   |
| <b>max</b> | 1.86   | 1.85   |

**Table S9 – Proton and carbon chemical shifts of signals integrated of the HSQC spectrum**

| Fragment                             | $\nu(F2)$ [ppm] | $\nu(F1)$ [ppm] |
|--------------------------------------|-----------------|-----------------|
| $^2A_{NS,6X}$                        | 3.31            | 61.2            |
| $^2A_{NS,3S,6X}$                     | 3.44            | 59.4            |
| $^2A_{NAC,6X}$                       | 3.92            | 56.4            |
| $^2A_{NH2,6X}$                       | 3.92            | 56.9            |
| $^6A_{NY,3X}$                        | 3.87            | 62.6            |
| $^6A_{NY,3X,6S}$                     | 4.36            | 69.1            |
| $^1A_{NS,6X}(G)$                     | 5.59            | 100.3           |
| $^1A_{NS,3S,6X}$                     | 99.0            | 5.52            |
| $^1A_{NS,6X}(I_{2S}) + ^1A_{NAC}(G)$ | 99.8            | 5.37            |
| $^1A_{NS,6X}(I)$                     | 98.3            | 5.36            |
| $^1A_{NAC,6X}(I_{2X})$               | 96.5            | 5.15            |
| $^1A_{NS,6X}aRed + ^1A_{NH2,6X}$     | 93.9            | 5.45            |
| $^1A_{NAC,6X}aRed$                   | 93.4            | 5.21            |
| $^1A_{NS,6X}(GalA) + ^1Unk$          | 102.0           | 5.4             |
| $^1I_{2S}(A_{NY,3X,6X}) + ^1GalA$    | 102.3           | 5.20            |
| $^1I(A_{NY,6S})$                     | 104.9           | 5.02            |
| $^1I(A_{NY})$                        | 104.7           | 4.95            |
| $^1G_{2S}$                           | 103.7           | 4.70            |
| $^1G(A_{NS,3S,6X})$                  | 103.9           | 4.62            |
| $^1G(A_{NS,6X})$                     | 104.9           | 4.62            |
| $^1G(A_{NAC,6X})$                    | 105.1           | 4.51            |
| $^1Gal(Xyl)$                         | 104.3           | 4.54            |
| $^1Xyl(Ser)$                         | 105.2           | 4.45            |
| $^1Xyl(ox-Ser)$                      | 105.8           | 4.45            |
| $^1G(Gal) + ^1Gal(Gal)$              | 106.7           | 4.66            |
| $^5GalA$                             | 74.5            | 4.70            |
| $^{1,2,3}epoxide$                    | 97.5            | 5.43            |
| $^1I_{2S}(A_{NH2,6X})$               | 101.3           | 5.25            |
| $^4G_{NR}$                           | 74.8            | 3.55            |
| $^3G_{NR}$                           | 78.0            | 3.54            |
| $^2A_{NAC}ox$                        | 59.0            | 4.37            |

**Table S10** -Molar percentual of glucosamine residues of 39 porcine heparin samples

| Samples | ANH2,6x    | ANAc,6x | ANS,3S,6x | ANS,6X | ANAc,6X-G | ANAc,6X-I  | ANS,6X-G | ANS,6X-I | ANS,6X-I2S | ANS,6X-GalA | ANS,6X-Epox | ANAc,6XaRed | ANS,6XaRed | % 6S |
|---------|------------|---------|-----------|--------|-----------|------------|----------|----------|------------|-------------|-------------|-------------|------------|------|
| PMH-1   | < LOD      | 11.5    | 5.5       | 83.0   | 11.5      | < LOD      | 9.0      | 9.9      | 59.1       | 4.3         | < LOD       | < LOD       | <u>0.8</u> | 81.1 |
| PMH-2   | < LOD      | 13.2    | 5.4       | 81.4   | 12.6      | <u>0.6</u> | 9.9      | 8.8      | 62.0       | <u>0.6</u>  | < LOD       | < LOD       | < LOD      | 79.1 |
| PMH-3   | < LOD      | 13.7    | 5.6       | 79.9   | 13.7      | < LOD      | 9.9      | 7.7      | 60.5       | <u>1.3</u>  | < LOD       | < LOD       | < LOD      | 79.8 |
| PMH-4   | < LOD      | 13.2    | 5.1       | 81.7   | 13.2      | < LOD      | 10.1     | 8.7      | 59.6       | 3.2         | < LOD       | < LOD       | < LOD      | 79.0 |
| PMH-5   | < LOD      | 11.8    | 4.4       | 83.8   | 11.8      | < LOD      | 9.7      | 8.5      | 63.4       | <u>2.2</u>  | < LOD       | < LOD       | < LOD      | 78.7 |
| PMH-6   | <u>1.5</u> | 14.7    | 4.9       | 78.9   | 14.7      | < LOD      | 9.5      | 8.8      | 59.9       | <u>1.0</u>  | < LOD       | < LOD       | < LOD      | 75.7 |
| PMH-7   | <u>1.5</u> | 12.6    | 5.0       | 80.9   | 10.9      | <u>0.8</u> | 9.0      | 8.8      | 62.9       | < LOD       | < LOD       | <u>0.9</u>  | < LOD      | 77.8 |
| PMH-8   | <u>1.0</u> | 12.9    | 5.5       | 80.6   | 12.9      | < LOD      | 9.9      | 7.6      | 61.5       | <u>1.6</u>  | < LOD       | < LOD       | < LOD      | 77.4 |
| PMH-9   | <u>1.6</u> | 13.3    | 4.8       | 80.3   | 12.3      | <u>1.1</u> | 9.2      | 8.2      | 62.8       | < LOD       | < LOD       | < LOD       | < LOD      | 77.1 |
| PMH-10  | <u>1.6</u> | 14.3    | 4.9       | 79.3   | 14.3      | < LOD      | 9.5      | 8.5      | 61.1       | < LOD       | < LOD       | < LOD       | < LOD      | 76.5 |
| PMH-11  | 2.2        | 12.5    | 4.7       | 80.5   | 11.8      | < LOD      | 10.4     | 9.0      | 60.0       | 2.3         | <u>1.0</u>  | <u>0.8</u>  | < LOD      | 76.7 |
| PMH-12  | <u>1.6</u> | 11.8    | 4.7       | 82.0   | 11.0      | <u>0.7</u> | 10.7     | 7.9      | 62.8       | <u>0.7</u>  | < LOD       | < LOD       | < LOD      | 78.5 |
| PMH-13  | <u>1.9</u> | 14.0    | 4.5       | 79.6   | 13.2      | <u>0.8</u> | 9.5      | 8.3      | 60.0       | <u>1.2</u>  | < LOD       | < LOD       | < LOD      | 76.9 |
| PMH-14  | <u>1.5</u> | 13.4    | 4.8       | 80.4   | 13.4      | < LOD      | 10.4     | 8.6      | 60.2       | <u>1.0</u>  | < LOD       | < LOD       | < LOD      | 77.4 |
| PMH-15  | 2.8        | 13.4    | 4.5       | 79.2   | 13.4      | < LOD      | 8.5      | 8.8      | 63.2       | < LOD       | < LOD       | < LOD       | < LOD      | 76.3 |
| PMH-16  | <u>1.4</u> | 13.9    | 4.6       | 80.2   | 13.9      | < LOD      | 9.2      | 8.5      | 61.0       | <u>1.2</u>  | < LOD       | < LOD       | < LOD      | 76.1 |
| PMH-17  | <u>2.1</u> | 12.8    | 5.2       | 80.0   | 12.8      | < LOD      | 8.0      | 7.6      | 63.9       | <u>1.4</u>  | < LOD       | < LOD       | < LOD      | 76.8 |
| PMH-18  | <u>1.8</u> | 15.1    | 5.0       | 78.2   | 14.3      | <u>0.8</u> | 8.3      | 8.8      | 61.1       | < LOD       | < LOD       | < LOD       | < LOD      | 75.0 |
| PMH-19  | <u>1.7</u> | 11.5    | 5.3       | 81.5   | 11.5      | < LOD      | 8.8      | 8.0      | 63.8       | <u>1.1</u>  | < LOD       | < LOD       | < LOD      | 79.6 |
| PMH-20  | <u>1.9</u> | 13.6    | 5.7       | 78.9   | 13.6      | < LOD      | 8.9      | 6.7      | 62.7       | < LOD       | < LOD       | < LOD       | < LOD      | 78.4 |
| PMH-21  | <u>0.7</u> | 12.9    | 4.8       | 81.6   | 12.9      | < LOD      | 10.1     | 9.4      | 61.7       | < LOD       | < LOD       | < LOD       | < LOD      | 77.4 |
| PMH-22  | < LOD      | 11.4    | 4.9       | 83.8   | 10.8      | <u>0.6</u> | 9.9      | 8.4      | 63.3       | <u>0.8</u>  | < LOD       | < LOD       | <u>1.3</u> | 77.5 |
| PMH-23  | <u>1.6</u> | 13.9    | 4.8       | 79.7   | 13.0      | <u>0.9</u> | 9.4      | 9.0      | 60.5       | < LOD       | < LOD       | < LOD       | <u>0.8</u> | 74.7 |
| PMH-24  | <u>1.2</u> | 13.7    | 4.1       | 81.1   | 11.5      | <u>0.6</u> | 10.3     | 8.7      | 59.0       | 2.0         | < LOD       | <u>1.6</u>  | <u>1.2</u> | 73.6 |
| PMH-25  | <u>2.0</u> | 12.5    | 5.0       | 80.5   | 11.5      | <u>0.9</u> | 9.9      | 6.5      | 62.9       | <u>0.7</u>  | < LOD       | < LOD       | < LOD      | 77.1 |
| PMH-26  | <u>0.6</u> | 12.3    | 5.0       | 82.1   | 11.6      | <u>0.7</u> | 10.3     | 6.9      | 63.7       | <u>0.8</u>  | < LOD       | < LOD       | < LOD      | 77.1 |
| PMH-27  | <u>0.7</u> | 13.2    | 5.3       | 80.8   | 13.2      | < LOD      | 9.7      | 8.1      | 62.0       | <u>0.6</u>  | < LOD       | < LOD       | < LOD      | 78.3 |
| PMH-28  | <u>0.9</u> | 11.7    | 4.7       | 82.7   | 10.7      | <u>1.0</u> | 10.1     | 8.7      | 62.6       | <u>0.9</u>  | < LOD       | < LOD       | < LOD      | 76.7 |
| PMH-29  | <u>1.0</u> | 13.7    | 4.8       | 80.5   | 11.8      | <u>0.8</u> | 9.9      | 8.5      | 63.1       | < LOD       | < LOD       | <u>1.0</u>  | < LOD      | 76.1 |
| PMH-30  | <u>1.7</u> | 11.5    | 6.7       | 80.1   | 10.9      | <u>0.6</u> | 9.1      | 7.6      | 62.2       | <u>1.0</u>  | < LOD       | < LOD       | < LOD      | 79.3 |
| PMH-31  | <u>1.6</u> | 12.2    | 5.7       | 80.6   | 11.4      | <u>0.8</u> | 9.2      | 8.4      | 61.6       | <u>1.4</u>  | < LOD       | < LOD       | < LOD      | 79.2 |
| PMH-32  | <u>1.7</u> | 15.3    | 5.4       | 77.6   | 14.0      | <u>0.7</u> | 9.3      | 8.5      | 58.1       | <u>1.6</u>  | < LOD       | <u>0.7</u>  | < LOD      | 74.7 |
| PMH-33  | <u>2.0</u> | 14.7    | 4.9       | 78.5   | 13.7      | <u>0.9</u> | 9.0      | 9.0      | 59.5       | <u>0.6</u>  | < LOD       | < LOD       | < LOD      | 77.3 |
| PMH-34  | 2.4        | 10.0    | 5.4       | 82.2   | 9.3       | <u>0.7</u> | 9.0      | 8.1      | 63.9       | <u>1.2</u>  | < LOD       | < LOD       | < LOD      | 81.2 |
| PMH-35  | <u>1.0</u> | 11.3    | 5.2       | 82.6   | 11.3      | < LOD      | 9.4      | 9.3      | 60.0       | 2.5         | <u>0.8</u>  | < LOD       | <u>0.8</u> | 82.3 |
| PMH-36  | <u>1.3</u> | 11.8    | 4.1       | 82.8   | 11.8      | < LOD      | 9.9      | 7.9      | 61.0       | 3.4         | < LOD       | < LOD       | <u>0.7</u> | 76.8 |
| PMH-37  | <u>1.3</u> | 11.2    | 4.1       | 83.4   | 10.0      | <u>0.6</u> | 9.8      | 9.2      | 60.3       | 3.6         | < LOD       | <u>0.6</u>  | < LOD      | 77.1 |
| PMH-38  | <u>1.1</u> | 11.1    | 3.8       | 84.0   | 11.1      | < LOD      | 11.0     | 7.0      | 62.3       | 3.2         | < LOD       | < LOD       | < LOD      | 76.7 |
| PMH-39  | <u>2.0</u> | 12.8    | 5.1       | 80.1   | 12.2      | <u>0.6</u> | 9.3      | 8.5      | 61.8       | <u>0.6</u>  | < LOD       | < LOD       | < LOD      | 78.4 |

**Table S11-** Molar percentual of uronic acids residues of 39 porcine mucosa heparin samples

| Samples | G2OH | G2S   | I2OH | I2S  | G-ANAc,6X | G-ANS,6X | G-ANS,3S,6X | I-ANY      | I-ANY,6S | I2S-ANH2,6X | I2S-ANY,3X,6X | GalA       | Epox       |
|---------|------|-------|------|------|-----------|----------|-------------|------------|----------|-------------|---------------|------------|------------|
| PMH-1   | 15.2 | < LOD | 8.8  | 72.7 | 5.4       | 6.4      | 3.4         | 2.2        | 6.6      | < LOD       | 72.7          | 3.3        | < LOD      |
| PMH-2   | 15.5 | < LOD | 9.3  | 75.2 | 6.4       | 6.7      | 2.4         | 2.7        | 6.6      | < LOD       | 75.2          | < LOD      | < LOD      |
| PMH-3   | 14.8 | < LOD | 9.4  | 75.8 | 5.4       | 6.1      | 3.3         | 2.7        | 6.7      | <u>1.5</u>  | 74.3          | < LOD      | < LOD      |
| PMH-4   | 16.1 | < LOD | 8.9  | 75.0 | 7.1       | 6.4      | 2.6         | 2.6        | 6.3      | < LOD       | 75.0          | < LOD      | < LOD      |
| PMH-5   | 15.1 | < LOD | 8.9  | 75.3 | 6.3       | 6.2      | 2.6         | <u>2.2</u> | 6.6      | < LOD       | 74.6          | <u>0.8</u> | < LOD      |
| PMH-6   | 15.9 | < LOD | 9.2  | 74.9 | 6.8       | 6.4      | 2.7         | 2.6        | 6.6      | <u>1.6</u>  | 73.4          | < LOD      | < LOD      |
| PMH-7   | 14.0 | < LOD | 9.9  | 76.2 | 5.3       | 5.8      | 2.9         | 3.2        | 6.7      | <u>1.9</u>  | 74.3          | < LOD      | < LOD      |
| PMH-8   | 15.8 | < LOD | 8.7  | 75.5 | 7.0       | 6.0      | 2.8         | 3.0        | 5.7      | <u>1.4</u>  | 74.2          | < LOD      | < LOD      |
| PMH-9   | 14.9 | < LOD | 9.4  | 75.8 | 5.8       | 6.6      | 2.5         | 2.6        | 6.8      | <u>1.7</u>  | 74.1          | < LOD      | < LOD      |
| PMH-10  | 14.8 | < LOD | 8.6  | 76.5 | 6.3       | 5.8      | 2.7         | 2.5        | 6.2      | <u>1.7</u>  | 74.8          | < LOD      | < LOD      |
| PMH-11  | 16.3 | < LOD | 9.2  | 72.6 | 7.1       | 6.9      | 2.3         | 2.7        | 6.5      | <u>1.5</u>  | 71.1          | <u>0.9</u> | <u>1.0</u> |
| PMH-12  | 14.7 | < LOD | 7.7  | 77.7 | 5.4       | 6.7      | 2.5         | 2.3        | 5.4      | <u>1.8</u>  | 75.9          | < LOD      | < LOD      |
| PMH-13  | 14.8 | < LOD | 9.8  | 75.4 | 5.9       | 5.6      | 3.3         | 2.8        | 7.0      | <u>2.2</u>  | 73.2          | < LOD      | < LOD      |
| PMH-14  | 15.4 | < LOD | 9.4  | 75.2 | 6.3       | 6.5      | 2.6         | 2.7        | 6.7      | <u>1.6</u>  | 73.6          | < LOD      | < LOD      |
| PMH-15  | 14.1 | < LOD | 10.0 | 75.9 | 5.7       | 5.8      | 2.6         | 3.1        | 6.9      | <u>2.1</u>  | 73.7          | < LOD      | < LOD      |
| PMH-16  | 15.9 | < LOD | 9.7  | 74.4 | 6.9       | 6.3      | 2.7         | 3.2        | 6.5      | <u>1.8</u>  | 72.7          | < LOD      | < LOD      |
| PMH-17  | 15.1 | < LOD | 9.2  | 75.7 | 5.6       | 6.6      | 2.9         | 2.5        | 6.7      | <u>2.0</u>  | 73.7          | < LOD      | < LOD      |
| PMH-18  | 16.4 | < LOD | 9.7  | 73.9 | 6.1       | 6.9      | 3.4         | 3.2        | 6.6      | <u>1.7</u>  | 72.2          | < LOD      | < LOD      |
| PMH-19  | 14.4 | < LOD | 7.9  | 77.7 | 6.5       | 5.3      | 2.7         | 2.4        | 5.5      | <u>1.7</u>  | 76.0          | < LOD      | < LOD      |
| PMH-20  | 13.1 | < LOD | 9.2  | 77.8 | 4.6       | 5.1      | 3.4         | 3.4        | 5.8      | 2.2         | 75.6          | < LOD      | < LOD      |
| PMH-21  | 15.4 | < LOD | 7.7  | 77.0 | 5.9       | 6.8      | 2.7         | 2.4        | 5.3      | <u>1.1</u>  | 75.9          | < LOD      | < LOD      |
| PMH-22  | 12.9 | < LOD | 7.5  | 79.6 | 4.4       | 6.3      | 2.1         | 2.4        | 5.1      | <u>1.0</u>  | 78.7          | < LOD      | < LOD      |
| PMH-23  | 16.1 | < LOD | 8.7  | 75.2 | 6.5       | 7.1      | 2.6         | 2.4        | 6.3      | 2.3         | 72.9          | < LOD      | < LOD      |
| PMH-24  | 16.7 | < LOD | 9.7  | 73.1 | 7.2       | 6.6      | 2.8         | 3.2        | 6.5      | <u>1.6</u>  | 71.5          | <u>0.6</u> | < LOD      |
| PMH-25  | 13.3 | < LOD | 9.4  | 77.3 | 4.6       | 5.8      | 2.9         | 3.1        | 6.3      | <u>2.0</u>  | 75.3          | < LOD      | < LOD      |
| PMH-26  | 15.3 | < LOD | 7.9  | 76.8 | 6.7       | 5.8      | 2.8         | 2.7        | 5.2      | <u>0.9</u>  | 75.9          | < LOD      | < LOD      |
| PMH-27  | 14.5 | < LOD | 7.9  | 77.6 | 6.0       | 6.2      | 2.3         | 2.7        | 5.2      | <u>0.7</u>  | 76.9          | < LOD      | < LOD      |
| PMH-28  | 14.9 | < LOD | 7.4  | 77.7 | 6.0       | 6.6      | 2.3         | 2.2        | 5.2      | <u>1.3</u>  | 76.4          | < LOD      | < LOD      |
| PMH-29  | 13.4 | < LOD | 9.2  | 77.4 | 4.8       | 6.8      | 1.9         | 2.6        | 6.6      | <u>1.0</u>  | 76.4          | < LOD      | < LOD      |
| PMH-30  | 14.9 | < LOD | 7.3  | 77.8 | 5.6       | 6.5      | 2.8         | <u>2.1</u> | 5.2      | <u>1.5</u>  | 76.3          | < LOD      | < LOD      |
| PMH-31  | 14.4 | < LOD | 7.3  | 78.3 | 6.4       | 5.4      | 2.5         | 2.3        | 4.9      | <u>1.6</u>  | 76.7          | < LOD      | < LOD      |
| PMH-32  | 17.5 | < LOD | 9.3  | 73.2 | 7.9       | 6.6      | 3.0         | 2.7        | 6.6      | <u>1.7</u>  | 71.6          | < LOD      | < LOD      |
| PMH-33  | 16.5 | < LOD | 9.4  | 74.1 | 6.6       | 7.0      | 3.0         | 2.6        | 6.8      | <u>2.0</u>  | 72.1          | < LOD      | < LOD      |
| PMH-34  | 13.6 | < LOD | 8.3  | 78.1 | 4.6       | 6.5      | 2.6         | 2.6        | 5.7      | <u>2.2</u>  | 75.9          | < LOD      | < LOD      |
| PMH-35  | 13.0 | < LOD | 7.8  | 77.3 | 5.0       | 5.4      | 2.6         | 2.1        | 5.7      | <u>1.4</u>  | 75.9          | <u>1.2</u> | <u>0.7</u> |
| PMH-36  | 14.5 | < LOD | 7.1  | 77.6 | 6.1       | 6.2      | 2.3         | 2.5        | 4.6      | <u>1.4</u>  | 76.2          | <u>0.8</u> | < LOD      |
| PMH-37  | 14.8 | < LOD | 7.3  | 76.5 | 5.7       | 6.9      | 2.2         | 2.3        | 5.0      | <u>1.4</u>  | 75.1          | <u>1.4</u> | < LOD      |
| PMH-38  | 15.2 | < LOD | 7.4  | 77.4 | 6.6       | 6.7      | <u>2.0</u>  | 2.5        | 4.9      | <u>1.1</u>  | 76.4          | < LOD      | < LOD      |
| PMH-39  | 15.1 | < LOD | 9.0  | 76.0 | 6.0       | 6.3      | 2.8         | 2.1        | 6.8      | 2.1         | 73.9          | < LOD      | < LOD      |

**Table S12** - Linkage region and sulfation degree of 39 porcine mucosa heparin samples

| Samples | LR  | %ox Ser | SDEG |
|---------|-----|---------|------|
| PMH-1   | 3.1 | 59.0    | 2.48 |
| PMH-2   | 3.8 | 70.0    | 2.46 |
| PMH-3   | 4.3 | 66.4    | 2.47 |
| PMH-4   | 3.8 | 79.7    | 2.46 |
| PMH-5   | 3.8 | 55.1    | 2.47 |
| PMH-6   | 5.1 | 100.0   | 2.39 |
| PMH-7   | 4.0 | 0.0     | 2.45 |
| PMH-8   | 3.8 | 100.0   | 2.44 |
| PMH-9   | 6.2 | 0.0     | 2.43 |
| PMH-10  | 5.3 | 0.0     | 2.42 |
| PMH-11  | 3.9 | 0.0     | 2.39 |
| PMH-12  | 4.1 | 47.3    | 2.48 |
| PMH-13  | 5.5 | 0.0     | 2.41 |
| PMH-14  | 4.9 | 0.0     | 2.43 |
| PMH-15  | 6.4 | 0.0     | 2.40 |
| PMH-16  | 5.2 | 24.0    | 2.40 |
| PMH-17  | 6.0 | 74.0    | 2.43 |
| PMH-18  | 6.2 | 100.0   | 2.37 |
| PMH-19  | 3.5 | 100.0   | 2.49 |
| PMH-20  | 6.1 | 0.0     | 2.46 |
| PMH-21  | 2.3 | 57.6    | 2.45 |
| PMH-22  | 1.4 | 0.0     | 2.51 |
| PMH-23  | 5.2 | 100.0   | 2.39 |
| PMH-24  | 3.2 | 36.0    | 2.36 |
| PMH-25  | 5.9 | 0.0     | 2.45 |
| PMH-26  | 2.1 | 100.0   | 2.46 |
| PMH-27  | 2.7 | 100.0   | 2.47 |
| PMH-28  | 2.2 | 52.2    | 2.47 |
| PMH-29  | 5.7 | 36.7    | 2.44 |
| PMH-30  | 2.8 | 100.0   | 2.51 |
| PMH-31  | 3.3 | 100.0   | 2.49 |
| PMH-32  | 5.0 | 79.8    | 2.36 |
| PMH-33  | 5.2 | 100.0   | 2.40 |
| PMH-34  | 4.3 | 0.0     | 2.52 |
| PMH-35  | 2.5 | 100.0   | 2.53 |
| PMH-36  | 3.6 | 100.0   | 2.45 |
| PMH-37  | 2.6 | 76.5    | 2.45 |
| PMH-38  | 3.7 | 70.0    | 2.46 |
| PMH-39  | 4.6 | 100.0   | 2.45 |

**Table S13 - Molar percentual of glucosamine residues of 39 bovine mucosa heparin samples**

| Sample | ANH2,6x    | ANAc,6x | ANS,3S,6x  | ANS,6X | ANAc,6X-G | ANAc,6X-I | ANS,6X-G | ANS,6X-I | ANS,6X-I2S | ANS,6X-GalA | ANS,6X-Epox | ANAc,6XaRed | ANS,6XaRed | % 6S |
|--------|------------|---------|------------|--------|-----------|-----------|----------|----------|------------|-------------|-------------|-------------|------------|------|
| BMH-1  | < LOD      | 6.8     | <u>2.1</u> | 91.2   | 6.8       | < LOD     | 17.2     | 4.2      | 67.4       | <u>1.0</u>  | < LOD       | < LOD       | <u>1.4</u> | 49.6 |
| BMH-2  | < LOD      | 7.2     | <u>1.3</u> | 91.6   | 7.2       | < LOD     | 17.1     | 3.2      | 70.2       | < LOD       | < LOD       | < LOD       | <u>1.1</u> | 51.2 |
| BMH-3  | <u>0.6</u> | 5.8     | <u>1.1</u> | 92.5   | 5.3       | < LOD     | 15.3     | 3.6      | 73.3       | < LOD       | < LOD       | <u>0.5</u>  | < LOD      | 50.6 |
| BMH-4  | < LOD      | 6.0     | <u>1.6</u> | 92.4   | 6.0       | < LOD     | 15.3     | 3.9      | 73.2       | < LOD       | < LOD       | < LOD       | < LOD      | 49.8 |
| BMH-5  | <u>0.8</u> | 6.3     | <u>1.3</u> | 91.5   | 6.3       | < LOD     | 15.4     | 3.8      | 71.1       | <u>0.6</u>  | < LOD       | < LOD       | <u>0.6</u> | 50.9 |
| E1     | < LOD      | 8.7     | <u>1.9</u> | 89.5   | 8.7       | < LOD     | 15.9     | 4.4      | 67.2       | <u>2.0</u>  | < LOD       | < LOD       | < LOD      | 52.5 |
| F1     | < LOD      | 7.5     | <u>1.4</u> | 91.0   | 6.6       | < LOD     | 17.3     | 5.3      | 67.0       | <u>1.5</u>  | < LOD       | <u>1.0</u>  | < LOD      | 52.0 |
| G1     | < LOD      | 7.0     | <u>1.8</u> | 91.2   | 5.9       | < LOD     | 15.5     | 4.1      | 69.8       | <u>1.2</u>  | < LOD       | <u>1.1</u>  | <u>0.6</u> | 53.1 |
| H1     | < LOD      | 8.0     | 1.8        | 90.2   | 7.1       | < LOD     | 15.8     | 4.9      | 68.5       | <u>0.9</u>  | < LOD       | <u>0.9</u>  | < LOD      | 54.8 |
| E2     | < LOD      | 11.3    | <u>2.0</u> | 86.8   | 10.5      | < LOD     | 16.4     | 4.7      | 63.9       | < LOD       | < LOD       | <u>0.8</u>  | <u>1.8</u> | 49.2 |
| F2     | 1.8        | 11.0    | 1.8        | 85.5   | 10.3      | < LOD     | 16.5     | 5.0      | 63.1       | <u>0.8</u>  | < LOD       | <u>0.7</u>  | < LOD      | 49.8 |
| G2     | <u>1.0</u> | 11.8    | <u>1.5</u> | 85.6   | 11.0      | < LOD     | 16.3     | 5.2      | 61.9       | <u>1.0</u>  | < LOD       | <u>0.8</u>  | <u>1.2</u> | 48.1 |
| K1     | <u>0.8</u> | 8.0     | <u>1.3</u> | 89.9   | 8.0       | < LOD     | 15.5     | 3.8      | 70.1       | <u>0.5</u>  | < LOD       | < LOD       | < LOD      | 50.4 |
| L1     | <u>1.3</u> | 6.4     | <u>1.6</u> | 90.7   | 5.7       | < LOD     | 16.1     | 4.9      | 68.3       | <u>1.4</u>  | < LOD       | <u>0.7</u>  | < LOD      | 52.3 |
| M1     | < LOD      | 5.9     | 1.9        | 92.2   | 5.9       | < LOD     | 16.8     | 3.5      | 68.8       | <u>1.3</u>  | < LOD       | < LOD       | <u>1.7</u> | 52.7 |
| N1     | <u>0.8</u> | 5.6     | 2.4        | 91.3   | 5.0       | < LOD     | 15.7     | 3.9      | 70.0       | <u>0.6</u>  | < LOD       | <u>0.6</u>  | <u>1.2</u> | 54.1 |
| O1     | <u>0.9</u> | 5.5     | 1.6        | 92.0   | 4.9       | < LOD     | 15.6     | 3.4      | 71.4       | <u>0.7</u>  | < LOD       | <u>0.7</u>  | <u>0.9</u> | 54.0 |
| P1     | < LOD      | 5.8     | <u>1.4</u> | 92.8   | 5.8       | < LOD     | 14.9     | 3.1      | 72.9       | <u>0.6</u>  | < LOD       | < LOD       | <u>1.4</u> | 50.4 |
| Q1     | <u>1.1</u> | 7.2     | <u>1.1</u> | 90.6   | 7.2       | < LOD     | 17.0     | 2.9      | 70.5       | < LOD       | < LOD       | < LOD       | < LOD      | 50.9 |
| R1     | <u>0.7</u> | 6.7     | <u>1.7</u> | 91.0   | 6.7       | < LOD     | 15.7     | 3.8      | 69.7       | <u>1.2</u>  | < LOD       | < LOD       | < LOD      | 51.1 |
| S1     | < LOD      | 6.2     | <u>1.6</u> | 92.2   | 6.2       | < LOD     | 15.9     | 3.3      | 71.3       | < LOD       | < LOD       | < LOD       | <u>1.7</u> | 48.8 |
| O2     | < LOD      | 6.1     | <u>2.0</u> | 91.3   | 6.1       | < LOD     | 17.0     | 4.7      | 58.1       | 8.9         | <u>1.3</u>  | < LOD       | <u>1.3</u> | 50.5 |
| P2     | < LOD      | 6.0     | <u>1.1</u> | 92.9   | 6.0       | < LOD     | 17.6     | 4.4      | 59.4       | 8.1         | <u>1.5</u>  | < LOD       | <u>2.0</u> | 49.8 |
| Q2     | < LOD      | 5.1     | <u>1.4</u> | 92.9   | 5.1       | < LOD     | 17.2     | 4.1      | 60.5       | 8.7         | <u>1.2</u>  | < LOD       | <u>1.3</u> | 50.5 |
| R2     | <u>1.4</u> | 5.5     | 2.0        | 91.1   | 5.5       | < LOD     | 16.4     | 5.1      | 51.0       | 13.7        | 5.1         | < LOD       | < LOD      | 51.2 |
| BMH-6  | < LOD      | 6.7     | 2.9        | 90.4   | 5.8       | < LOD     | 16.4     | 5.1      | 66.8       | <u>0.8</u>  | < LOD       | <u>0.9</u>  | <u>1.2</u> | 54.6 |
| BMH-7  | <u>1.3</u> | 8.8     | 2.0        | 87.9   | 8.8       | < LOD     | 15.1     | 5.0      | 66.4       | <u>1.4</u>  | < LOD       | < LOD       | < LOD      | 52.4 |
| BMH-8  | <u>1.0</u> | 7.3     | <u>1.8</u> | 90.0   | 7.3       | < LOD     | 15.4     | 4.3      | 68.1       | <u>1.8</u>  | < LOD       | < LOD       | < LOD      | 53.5 |
| BMH-9  | < LOD      | 7.6     | 2.4        | 90.1   | 6.6       | < LOD     | 15.9     | 4.2      | 66.3       | 2.4         | < LOD       | <u>1.0</u>  | <u>1.3</u> | 50.2 |
| BMH-10 | <u>1.1</u> | 9.0     | 2.0        | 87.9   | 9.0       | < LOD     | 15.9     | 4.6      | 65.8       | 1.8         | < LOD       | < LOD       | < LOD      | 49.7 |
| BMH-11 | < LOD      | 8.6     | <u>1.2</u> | 90.3   | 8.6       | < LOD     | 17.0     | 3.7      | 67.0       | <u>1.2</u>  | < LOD       | < LOD       | <u>1.4</u> | 47.1 |
| BMH-12 | <u>0.7</u> | 6.0     | <u>1.7</u> | 91.6   | 5.1       | < LOD     | 15.2     | 4.4      | 65.7       | 5.7         | < LOD       | <u>0.9</u>  | <u>0.6</u> | 54.9 |
| BMH-13 | < LOD      | 6.9     | <u>1.8</u> | 91.3   | 6.1       | < LOD     | 15.1     | 4.8      | 64.4       | 5.8         | < LOD       | <u>0.8</u>  | <u>1.1</u> | 53.4 |
| BMH-14 | < LOD      | 7.5     | <u>2.3</u> | 90.3   | 6.6       | < LOD     | 14.7     | 4.5      | 64.8       | 4.9         | < LOD       | <u>0.9</u>  | <u>1.4</u> | 55.0 |
| BMH-15 | <u>0.8</u> | 7.8     | <u>2.3</u> | 89.2   | 7.8       | < LOD     | 16.3     | 3.8      | 63.4       | 6.5         | < LOD       | < LOD       | < LOD      | 55.8 |
| BMH-16 | < LOD      | 7.4     | <u>2.2</u> | 90.5   | 7.4       | < LOD     | 14.5     | 4.1      | 70.7       | < LOD       | < LOD       | < LOD       | <u>1.1</u> | 56.5 |
| BMH-17 | < LOD      | 8.0     | 2.1        | 89.9   | 8.0       | < LOD     | 14.9     | 4.9      | 65.3       | 3.2         | < LOD       | < LOD       | <u>1.5</u> | 54.9 |
| BMH-18 | < LOD      | 7.4     | 2.1        | 90.6   | 6.7       | < LOD     | 14.9     | 4.5      | 65.5       | 4.4         | < LOD       | <u>0.6</u>  | <u>1.4</u> | 58.0 |
| BMH-19 | <u>0.6</u> | 7.4     | 2.1        | 90.0   | 6.7       | < LOD     | 14.6     | 4.9      | 63.7       | 5.5         | < LOD       | <u>0.7</u>  | <u>1.1</u> | 55.5 |



**Table S14 - Molar percentual of uronic acid residues of 39 bovine mucosa heparin samples**

| Sample | G2OH | G2S        | I2OH | I2S  | G-ANAc,6X | G-ANS,6X | G-ANS,3S,6X | I-ANY      | I-ANY,6S   | I2S-ANH2,6X | I2S-ANY,3X,6X | GalA       | EpoX       |
|--------|------|------------|------|------|-----------|----------|-------------|------------|------------|-------------|---------------|------------|------------|
| BMH-1  | 13.5 | <u>1.9</u> | 4.7  | 77.9 | 7.9       | 5.6      | < LOD       | 3.1        | <u>1.6</u> | <u>0.8</u>  | 77.1          | <u>2.0</u> | < LOD      |
| BMH-2  | 13.8 | <u>1.9</u> | 4.5  | 79.8 | 8.7       | 5.0      | < LOD       | 3.3        | <u>1.2</u> | <u>1.6</u>  | 78.3          | < LOD      | < LOD      |
| BMH-3  | 13.7 | 2.1        | 3.8  | 80.4 | 8.0       | 4.9      | <u>0.8</u>  | 2.9        | <u>0.9</u> | <u>1.2</u>  | 79.2          | < LOD      | < LOD      |
| BMH-4  | 12.5 | <u>1.8</u> | 3.8  | 81.9 | 8.7       | 3.8      | < LOD       | <u>2.8</u> | <u>1.0</u> | <u>1.3</u>  | 80.6          | < LOD      | < LOD      |
| BMH-5  | 12.4 | 1.6        | 3.5  | 82.5 | 8.0       | 4.4      | < LOD       | 2.7        | <u>0.9</u> | 1.6         | 80.9          | < LOD      | < LOD      |
| E1     | 14.3 | <u>2.0</u> | 5.2  | 78.5 | 8.6       | 5.7      | < LOD       | 3.2        | <u>2.1</u> | <u>0.8</u>  | 77.7          | < LOD      | < LOD      |
| F1     | 13.6 | <u>1.8</u> | 4.4  | 80.2 | 8.2       | 5.4      | < LOD       | 2.8        | <u>1.6</u> | < LOD       | 80.2          | < LOD      | < LOD      |
| G1     | 13.5 | 2.1        | 4.9  | 79.5 | 8.5       | 4.9      | < LOD       | 3.1        | <u>1.8</u> | < LOD       | 79.5          | < LOD      | < LOD      |
| H1     | 13.3 | 1.9        | 5.1  | 79.8 | 6.9       | 5.8      | < LOD       | 3.0        | 2.1        | <u>0.6</u>  | 79.2          | < LOD      | < LOD      |
| E2     | 17.6 | <u>1.8</u> | 6.1  | 74.5 | 10.5      | 7.0      | < LOD       | 3.7        | 2.4        | <u>1.2</u>  | 73.4          | < LOD      | < LOD      |
| F2     | 17.8 | 1.8        | 5.7  | 74.7 | 11.3      | 5.7      | <u>0.8</u>  | 3.7        | 1.9        | <u>1.6</u>  | 73.1          | < LOD      | < LOD      |
| G2     | 17.9 | 1.9        | 6.2  | 74.0 | 11.7      | 6.3      | < LOD       | 4.1        | 2.1        | <u>1.3</u>  | 72.7          | < LOD      | < LOD      |
| K1     | 13.8 | <u>1.6</u> | 4.1  | 80.6 | 8.7       | 5.0      | < LOD       | 2.9        | <u>1.2</u> | <u>1.2</u>  | 79.3          | < LOD      | < LOD      |
| L1     | 12.9 | 2.1        | 4.4  | 80.7 | 7.6       | 5.2      | < LOD       | 2.9        | <u>1.4</u> | <u>1.4</u>  | 79.3          | < LOD      | < LOD      |
| M1     | 13.6 | <u>1.7</u> | 4.0  | 80.6 | 7.2       | 5.7      | <u>0.8</u>  | 2.5        | <u>1.6</u> | <u>1.5</u>  | 79.1          | < LOD      | < LOD      |
| N1     | 12.9 | 1.7        | 3.9  | 81.6 | 6.9       | 5.4      | <u>0.5</u>  | 3.0        | <u>0.9</u> | 1.6         | 79.9          | < LOD      | < LOD      |
| O1     | 12.8 | 2.0        | 3.7  | 81.5 | 7.2       | 4.8      | <u>0.8</u>  | 2.7        | <u>1.0</u> | <u>1.5</u>  | 80.1          | < LOD      | < LOD      |
| P1     | 12.3 | <u>1.6</u> | 3.7  | 82.5 | 8.0       | 4.3      | < LOD       | 2.7        | <u>1.0</u> | <u>1.9</u>  | 80.6          | < LOD      | < LOD      |
| Q1     | 13.7 | <u>1.8</u> | 4.1  | 80.4 | 9.0       | 4.7      | < LOD       | 3.0        | <u>1.1</u> | <u>1.2</u>  | 79.2          | < LOD      | < LOD      |
| R1     | 12.9 | <u>1.8</u> | 4.4  | 80.9 | 8.2       | 4.6      | < LOD       | 3.2        | <u>1.2</u> | <u>1.5</u>  | 79.4          | < LOD      | < LOD      |
| S1     | 12.3 | <u>1.9</u> | 3.9  | 82.0 | 7.9       | 4.4      | < LOD       | 2.6        | <u>1.3</u> | <u>1.4</u>  | 80.5          | < LOD      | < LOD      |
| O2     | 13.2 | <u>2.2</u> | 4.7  | 74.4 | 8.1       | 5.1      | < LOD       | 2.9        | <u>1.9</u> | <u>1.0</u>  | 73.3          | 4.3        | <u>1.3</u> |
| P2     | 13.2 | <u>2.1</u> | 4.2  | 71.9 | 8.1       | 5.2      | < LOD       | 2.4        | <u>1.7</u> | <u>0.9</u>  | 71.0          | 7.2        | <u>1.4</u> |
| Q2     | 12.2 | 2.1        | 4.0  | 74.2 | 7.3       | 4.9      | < LOD       | 2.4        | <u>1.7</u> | <u>0.7</u>  | 73.6          | 6.4        | <u>1.1</u> |
| R2     | 12.9 | 2.6        | 3.9  | 66.1 | 6.9       | 5.4      | <u>0.6</u>  | 2.5        | <u>1.4</u> | <u>0.8</u>  | 65.3          | 9.8        | 4.8        |
| BMH-6  | 13.7 | <u>1.4</u> | 4.9  | 77.8 | 7.4       | 6.4      | < LOD       | 2.8        | <u>2.1</u> | <u>0.8</u>  | 77.0          | 2.2        | < LOD      |
| BMH-7  | 13.7 | 1.9        | 5.2  | 78.4 | 8.0       | 4.6      | <u>1.1</u>  | 3.6        | <u>1.6</u> | <u>1.0</u>  | 77.4          | <u>0.8</u> | < LOD      |
| BMH-8  | 13.3 | <u>1.7</u> | 4.3  | 79.7 | 8.0       | 5.3      | < LOD       | 2.7        | <u>1.6</u> | <u>1.4</u>  | 78.4          | <u>1.0</u> | < LOD      |
| BMH-9  | 14.1 | <u>1.8</u> | 4.7  | 79.4 | 9.0       | 5.1      | < LOD       | 3.2        | <u>1.5</u> | <u>1.6</u>  | 77.8          | < LOD      | < LOD      |
| BMH-10 | 15.5 | <u>1.6</u> | 4.4  | 78.5 | 8.8       | 5.8      | <u>1.0</u>  | 3.1        | <u>1.3</u> | <u>1.1</u>  | 77.3          | < LOD      | < LOD      |
| BMH-11 | 14.1 | 2.0        | 4.7  | 79.2 | 9.1       | 5.0      | < LOD       | 3.3        | <u>1.4</u> | <u>1.2</u>  | 77.9          | < LOD      | < LOD      |
| BMH-12 | 11.6 | <u>1.6</u> | 4.8  | 78.8 | 6.3       | 5.3      | < LOD       | 3.0        | 1.9        | <u>1.3</u>  | 77.5          | 3.2        | < LOD      |
| BMH-13 | 13.1 | <u>1.3</u> | 4.8  | 78.7 | 8.0       | 5.1      | < LOD       | 2.7        | <u>2.1</u> | <u>1.2</u>  | 77.5          | <u>2.1</u> | < LOD      |
| BMH-14 | 13.8 | <u>1.1</u> | 5.1  | 78.5 | 7.3       | 5.7      | <u>0.8</u>  | 3.3        | <u>1.8</u> | <u>1.3</u>  | 77.2          | <u>1.6</u> | < LOD      |
| BMH-15 | 14.3 | <u>1.5</u> | 5.2  | 78.1 | 7.4       | 5.5      | <u>1.5</u>  | 3.1        | <u>2.1</u> | <u>1.4</u>  | 76.7          | <u>0.9</u> | < LOD      |
| BMH-16 | 12.5 | <u>1.1</u> | 4.9  | 81.6 | 8.1       | 4.4      | < LOD       | 2.8        | <u>2.1</u> | <u>0.9</u>  | 80.6          | < LOD      | < LOD      |
| BMH-17 | 13.2 | <u>1.5</u> | 4.8  | 79.5 | 7.3       | 5.9      | < LOD       | 3.0        | <u>1.8</u> | <u>1.4</u>  | 78.1          | <u>0.9</u> | < LOD      |
| BMH-18 | 13.1 | <u>1.1</u> | 5.2  | 79.3 | 7.5       | 4.7      | <u>0.9</u>  | 3.2        | 1.9        | <u>1.4</u>  | 77.9          | <u>1.4</u> | < LOD      |
| BMH-19 | 13.3 | <u>1.2</u> | 4.8  | 78.6 | 7.8       | 5.5      | < LOD       | 3.0        | <u>1.7</u> | <u>1.5</u>  | 77.1          | 2.2        | < LOD      |

**Table S15 - Linkage region and sulfation degree of 39 bovine mucosa heparin samples**

| Sample | LR         | oxSer | DSulf |
|--------|------------|-------|-------|
| BMH-1  | 3.0        | 100.0 | 2.26  |
| BMH-2  | 2.8        | 74.6  | 2.25  |
| BMH-3  | <u>1.8</u> | 100.0 | 2.27  |
| BMH-4  | 1.6        | 100.0 | 2.28  |
| BMH-5  | <u>1.8</u> | 100.0 | 2.28  |
| E1     | 1.7        | 100.0 | 2.29  |
| F1     | 3.3        | 100.0 | 2.26  |
| G1     | 2.4        | 79.5  | 2.28  |
| H1     | 2.8        | 100.0 | 2.30  |
| E2     | 2.4        | 100.0 | 2.30  |
| F2     | 4.1        | 100.0 | 2.16  |
| G2     | 5.7        | 30.2  | 2.15  |
| K1     | 4.1        | 38.9  | 2.13  |
| L1     | 2.1        | 100.0 | 2.25  |
| M1     | <u>1.0</u> | 100.0 | 2.29  |
| N1     | <u>1.0</u> | 100.0 | 2.31  |
| O1     | 1.3        | 100.0 | 2.33  |
| P1     | <u>1.1</u> | 100.0 | 2.33  |
| Q1     | <u>1.5</u> | 100.0 | 2.30  |
| R1     | <u>2.1</u> | 100.0 | 2.26  |
| S1     | 2.2        | 100.0 | 2.28  |
| O2     | <u>1.8</u> | 100.0 | 2.31  |
| P2     | 2.6        | 100.0 | 2.30  |
| Q2     | 4.4        | 54.8  | 2.25  |
| R2     | 3.3        | 100.0 | 2.28  |
| BMH-6  | 4.1        | 64.1  | 2.22  |
| BMH-7  | 4.0        | 42.0  | 2.21  |
| BMH-8  | 2.0        | 100.0 | 2.30  |
| BMH-9  | <u>1.6</u> | 100.0 | 2.28  |
| BMH-10 | 2.1        | 100.0 | 2.29  |
| BMH-11 | <u>1.7</u> | 100.0 | 2.27  |
| BMH-12 | 2.8        | 100.0 | 2.28  |
| BMH-13 | <u>2.2</u> | 100.0 | 2.29  |
| BMH-14 | 3.2        | 100.0 | 2.29  |
| BMH-15 | 3.7        | 100.0 | 2.34  |
| BMH-16 | <u>1.7</u> | 100.0 | 2.28  |
| BMH-17 | 3.7        | 100.0 | 2.30  |
| BMH-18 | 3.2        | 100.0 | 2.33  |
| BMH-19 | 2.8        | 63.2  | 2.29  |

**Table S16-** Molar percentual of glucosamine residues of 7 beef lung heparin samples

| Sample | ANH2,6x    | ANAc,6x | ANS,3S,6x | ANS,6X | ANAc,6X-G | ANAc,6X-I  | ANS,6X-G | ANS,6X-I | ANS,6X-I2S | ANS,6X-GalA | ANS,6X-Epox | ANAc,6XaRed | ANS,6XaRed | % 6S |
|--------|------------|---------|-----------|--------|-----------|------------|----------|----------|------------|-------------|-------------|-------------|------------|------|
| BLH-1  | <u>0.5</u> | 1.7     | 2.9       | 94.8   | 1.7       | < LOD      | 5.2      | 3.7      | 83.5       | <u>1.4</u>  | < LOD       | < LOD       | <u>1.1</u> | 90.3 |
| BLH-2  | <u>0.5</u> | 1.9     | 2.6       | 94.9   | 1.9       | < LOD      | 7.2      | 4.2      | 79.3       | <u>0.9</u>  | < LOD       | < LOD       | 3.2        | 90.2 |
| BLH-3  | <u>0.7</u> | 2.9     | 2.9       | 93.4   | 2.9       | < LOD      | 7.5      | 3.5      | 80.3       | < LOD       | < LOD       | < LOD       | 2.2        | 89.4 |
| BLH-4  | <u>0.6</u> | 2.2     | 3.5       | 93.7   | 1.7       | <u>0.5</u> | 7.8      | 3.9      | 78.8       | <u>0.8</u>  | < LOD       | < LOD       | 2.5        | 88.9 |
| BLH-5  | <u>0.6</u> | 3.1     | 2.4       | 93.9   | 3.1       | < LOD      | 8.3      | 4.4      | 77.5       | <u>0.8</u>  | < LOD       | < LOD       | 2.8        | 87.8 |
| BLH-6  | <u>0.8</u> | 3.5     | 3.3       | 92.4   | 3.5       | < LOD      | 7.7      | 3.1      | 79.4       | < LOD       | < LOD       | < LOD       | 2.2        | 88.6 |
| BLH-7  | <u>0.8</u> | 3.2     | 3.5       | 92.5   | 2.7       | <u>0.5</u> | 7.8      | 4.5      | 77.5       | <u>0.6</u>  | < LOD       | < LOD       | 2.1        | 88.4 |

**Table S17** - Molar percentual of uronic acid residues of 7 beef lung heparin samples

| Sample | G2OH | G2S        | I2OH | I2S  | G-ANAc,6X  | G-ANS,6X   | G-ANS,3S,6X | I-ANY      | I-ANY,6S | I2S-ANH2,6X | I2S-ANY,3X,6X | GalA  | EpoX  |
|--------|------|------------|------|------|------------|------------|-------------|------------|----------|-------------|---------------|-------|-------|
| BLH-1  | 2.7  | < LOD      | 2.1  | 95.3 | <u>0.5</u> | <u>1.4</u> | <u>0.8</u>  | < LOD      | 2.1      | <u>0.8</u>  | 94.4          | < LOD | < LOD |
| BLH-2  | 4.6  | <u>0.4</u> | 2.9  | 92.1 | 1.7        | 2.0        | <u>0.8</u>  | <u>0.8</u> | 2.1      | <u>1.4</u>  | 90.7          | < LOD | < LOD |
| BLH-3  | 4.4  | <u>0.5</u> | 2.7  | 92.4 | 1.5        | 2.2        | <u>0.7</u>  | <u>0.6</u> | 2.1      | <u>1.1</u>  | 91.3          | < LOD | < LOD |
| BLH-4  | 4.5  | <u>0.5</u> | 2.6  | 92.4 | 1.7        | 2.2        | <u>0.6</u>  | < LOD      | 2.6      | <u>1.1</u>  | 91.2          | < LOD | < LOD |
| BLH-5  | 5.4  | <u>0.7</u> | 3.5  | 90.3 | 2.0        | 2.6        | <u>0.9</u>  | <u>1.0</u> | 2.6      | <u>1.1</u>  | 89.3          | < LOD | < LOD |
| BLH-6  | 4.3  | < LOD      | 3.2  | 92.5 | 1.6        | 2.7        | < LOD       | <u>0.8</u> | 2.4      | <u>1.2</u>  | 91.3          | < LOD | < LOD |
| BLH-7  | 5.4  | <u>0.6</u> | 3.3  | 90.8 | 1.8        | 2.6        | <u>1.0</u>  | <u>0.9</u> | 2.4      | 1.9         | 88.9          | < LOD | < LOD |

**Table S18** - Linkage region and sulfation degree of 7 Beef lung heparin samples

| Sample | LR         | %ox Ser | DSulf |
|--------|------------|---------|-------|
| BLH-1  | < LOD      | NA      | 2.86  |
| BLH-2  | <u>1.3</u> | 100.0   | 2.83  |
| BLH-3  | <u>1.3</u> | 100.0   | 2.82  |
| BLH-4  | <u>1.1</u> | 10.00   | 2.82  |
| BLH-5  | <u>1.0</u> | 100.0   | 2.78  |
| BLH-6  | 1.5        | 64.0    | 2.80  |
| BLH-7  | 1.5        | 72.1    | 2.79  |

**Table S19 - Molar percentual of glucosamine residues of 6 ovine mucosa heparin samples**

| Sample | ANH2,6x    | ANAc,6x | ANS,3S,6x | ANS,6X | ANAc,6X-G | ANAc,6X-I | ANS,6X-G | ANS,6X-I | ANS,6X-I2S | ANS,6X-GalA | ANS,6X-Epox | ANAc,6XaRed | ANS,6XaRed | % 6S |
|--------|------------|---------|-----------|--------|-----------|-----------|----------|----------|------------|-------------|-------------|-------------|------------|------|
| OMH-1  | < LOD      | 5.2     | 7.3       | 87.5   | 4.5       | < LOD     | 12.9     | 7.8      | 58.4       | 6.5         | < LOD       | 0.7         | 2.0        | 89.6 |
| OMH-2  | < LOD      | 4.9     | 5.4       | 89.7   | 4.1       | < LOD     | 8.7      | 5.5      | 72.9       | <u>0.7</u>  | < LOD       | <u>0.8</u>  | 2.0        | 86.4 |
| OMH-3  | <u>0.9</u> | 5.1     | 5.7       | 88.3   | 4.2       | < LOD     | 10.1     | 5.0      | 70.4       | <u>1.4</u>  | < LOD       | <u>0.9</u>  | <u>1.4</u> | 86.7 |
| OMH-4  | < LOD      | 4.5     | 5.5       | 90.0   | 3.7       | < LOD     | 9.9      | 5.5      | 71.0       | <u>1.6</u>  | < LOD       | <u>0.8</u>  | 2.0        | 87.9 |
| OMH-5  | <u>1.1</u> | 5.8     | 6.6       | 86.5   | 4.7       | < LOD     | 11.0     | 6.1      | 68.1       | < LOD       | < LOD       | <u>1.1</u>  | <u>1.4</u> | 86.9 |
| OMH-6  | <u>0.9</u> | 7.1     | 7.2       | 84.8   | 5.8       | < LOD     | 11.2     | 5.6      | 65.5       | <u>0.7</u>  | < LOD       | <u>1.3</u>  | <u>1.8</u> | 86.0 |

**Table S20** - Molar percentual of uronic acid of 6 ovine mucosa heparin samples

| Sample | G2OH  | G2S   | I2OH | I2S   | G-ANAc,6X  | G-ANS,6X | G-ANS,3S,6X | I-ANY      | I-ANY,6S | I2S-ANH2,6X | I2S-ANY,3X,6X | GalA  | EpoX  |
|--------|-------|-------|------|-------|------------|----------|-------------|------------|----------|-------------|---------------|-------|-------|
| OMH-1  | 11.98 | < LOD | 6.83 | 71.41 | 2.31       | 6.84     | 2.83        | 0.7        | 6.13     | < LOD       | 71.41         | 9.78  | < LOD |
| OMH-2  | 7.8   | < LOD | 5.1  | 87.1  | <u>1.4</u> | 5.1      | <u>1.3</u>  | <u>0.6</u> | 4.6      | <u>0.8</u>  | 86.4          | < LOD | < LOD |
| OMH-3  | 6.9   | < LOD | 5.2  | 87.9  | <u>1.6</u> | 4.4      | <u>0.9</u>  | <u>0.9</u> | 4.3      | <u>1.2</u>  | 86.7          | < LOD | < LOD |
| OMH-4  | 7.3   | < LOD | 6.1  | 86.6  | <u>1.5</u> | 4.8      | <u>1.0</u>  | <u>0.9</u> | 5.2      | < LOD       | 86.6          | < LOD | < LOD |
| OMH-5  | 7.8   | < LOD | 5.9  | 86.4  | 2.3        | 4.4      | <u>1.0</u>  | <u>0.8</u> | 5.1      | <u>1.5</u>  | 84.9          | < LOD | < LOD |
| OMH-6  | 8.2   | < LOD | 6.0  | 85.9  | 2.6        | 4.7      | <u>0.9</u>  | <u>0.7</u> | 5.2      | <u>1.2</u>  | 84.7          | < LOD | < LOD |

**Table S21** - Linkage region and sulfation degree of 6 ovine mucosa heparin samples

| Sample | LR  | %ox Ser | DSulf |
|--------|-----|---------|-------|
| OMH-1  | 1.4 | 100.0   | 2.63  |
| OMH-2  | 2.5 | 26.4    | 2.74  |
| OMH-3  | 2.7 | 0.0     | 2.74  |
| OMH-4  | 2.6 | 0.0     | 2.76  |
| OMH-5  | 3.8 | 27.9    | 2.73  |
| OMH-6  | 3.4 | 42.5    | 2.71  |
